# Supplementary material
Source: PubMed Central journal article supplement (PMC4609585)

**Matrix Metalloproteinase 9 mediated intracerebral hemorrhage induced by Cerebral amyloid angiopathy**

Lingzhi Zhao, PhD<sup>a</sup>, Michal Arbel-Ornath, PhD<sup>a</sup>, Xueying Wang, PhD<sup>a</sup>, Rebecca A. Betensky, PhD<sup>b</sup>, Steven M. Greenberg, MD, PhD<sup>a</sup>, Matthew P. Frosch, MD, PhD<sup>a,c</sup>, Brian J. Bacskai, PhD<sup>a,\*</sup>

<sup>a</sup>Department of Neurology/Alzheimer Research Unit, Massachusetts General Hospital, Charlestown, Massachusetts 02129

<sup>b</sup>Department of Biostatistics, Harvard School of Public Health, Boston, Massachusetts 02115

<sup>c</sup>C.S. Kubik Laboratory of Neuropathology, Department of Pathology, Massachusetts General Hospital, Boston, Massachusetts 02114

\* Corresponding author: Brian J. Bacskai, PhD  
Massachusetts General Hospital  
114 16th St.  
Charlestown, MA 02129  
Tel: (617) 724-5306  
Fax: (617) 724-1480  
Email: [bbacskai@partners.org](mailto:bbacskai@partners.org)

## **Supplemental Figure Legends**

### **Supplemental Fig. 1 Recruitment of astrocytes around CAA-affected vessels. (A)**

Representative immunostaining of astrocytes and MMP-9 in CAA-affected vessels. Brain sections from CAA patients (upper panel) or control individuals (lower panel) were stained with thioflavinS (green), an antibody recognizing glial fibrillary acidic protein (GFAP, red), and an antibody recognizing MMP-9 (brown). The images were merged to show the spatial relationship between A $\beta$ , MMP-9, and astrocytes. MMP-9 was shown in blue (pseudo color) in merged picture. Scale bar = 20  $\mu$ m. (B) Representative confocal image shows the recruitment of astrocytes around CAA-affected vessels. Green: GFAP; blue (pseudo color): thioflavin-S.

### **Supplemental Fig. 2 Topical application of boiled rMMP-9 failed to induce hemorrhage.**

Representative images of mouse brains topically treated with 0.4  $\mu$ g rMMP-9 or rMMP-9 preheated at 90 °C for 30 minutes (boiled MMP-9). C57/BL6 mice at 3 months of age were prepared with a craniotomy followed by careful removal of the dura mater. The mouse brains were immediately imaged for background images (A and B) using an Ultra-Compact Monochrome 752 x 480 CMOS camera (Mightex Systems, Toronto, Canada) installed on a Zeiss Stemi SV6 Stereo Zoom Microscope (Carl Zeiss, Jena, Germany). rMMP-9 (MMP-9) or boiled rMMP-9 (boiled MMP-9) was topically applied to the surface of mouse brains. Forty eight hours after treatment, the mouse brains treated with rMMP-9 (A') or boiled rMMP-9 (B') were imaged. Arrows show the hemorrhage induced by rMMP-9.

# Supplemental Fig. 1

**A**

**GFAP**

**MMP-9**

**Thio-S**

**merged**

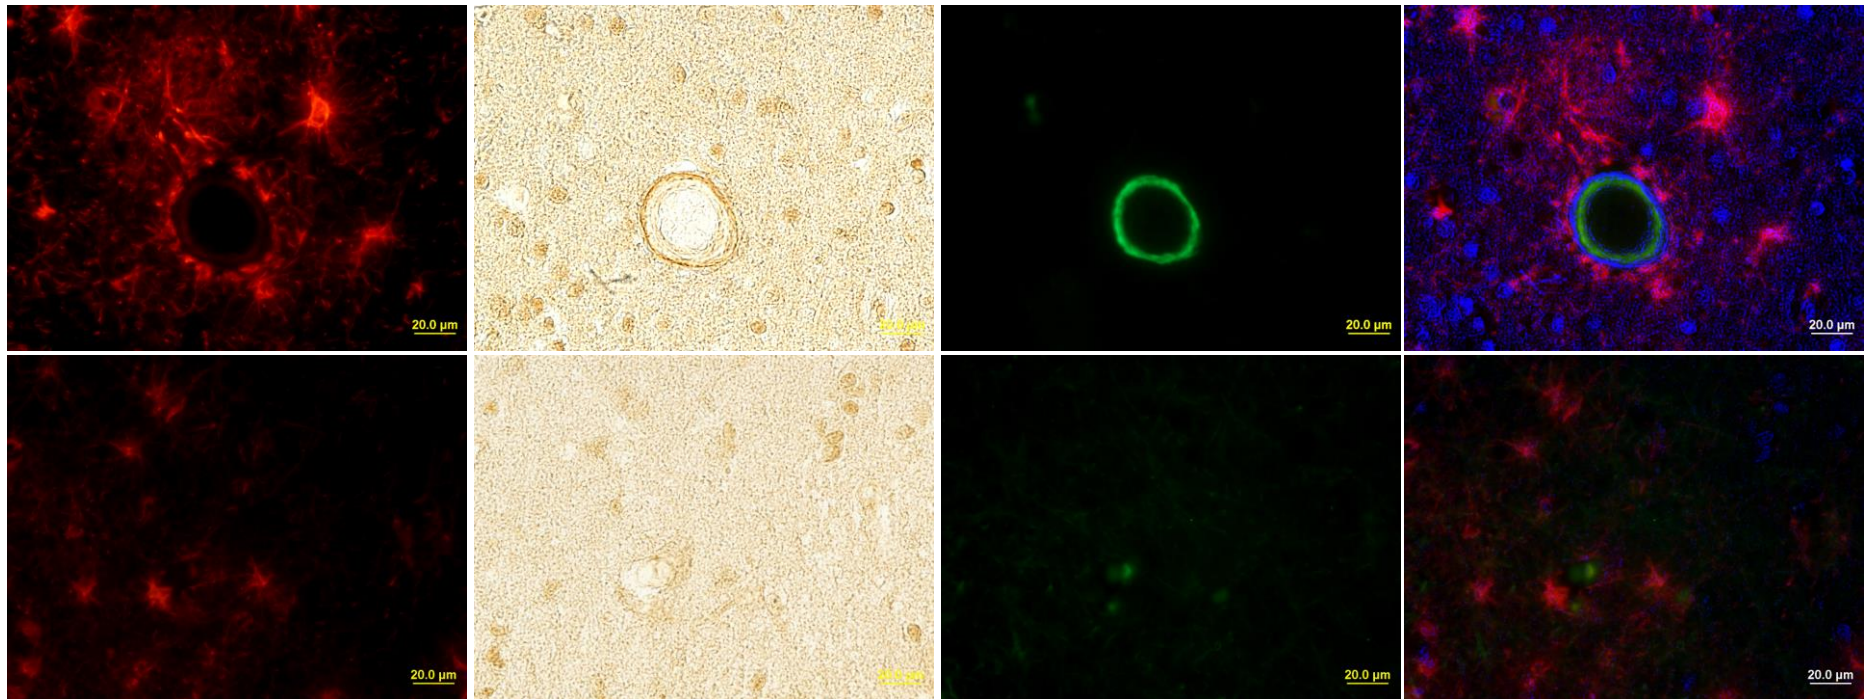

**B**

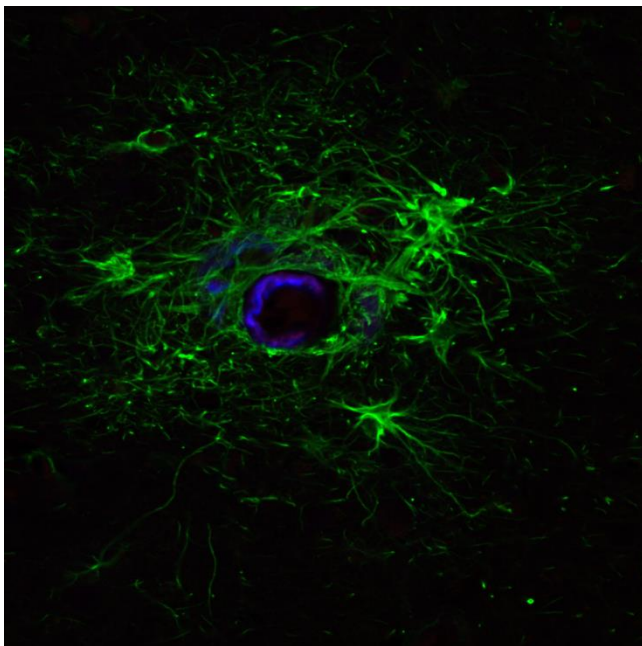

## Supplemental Fig. 2

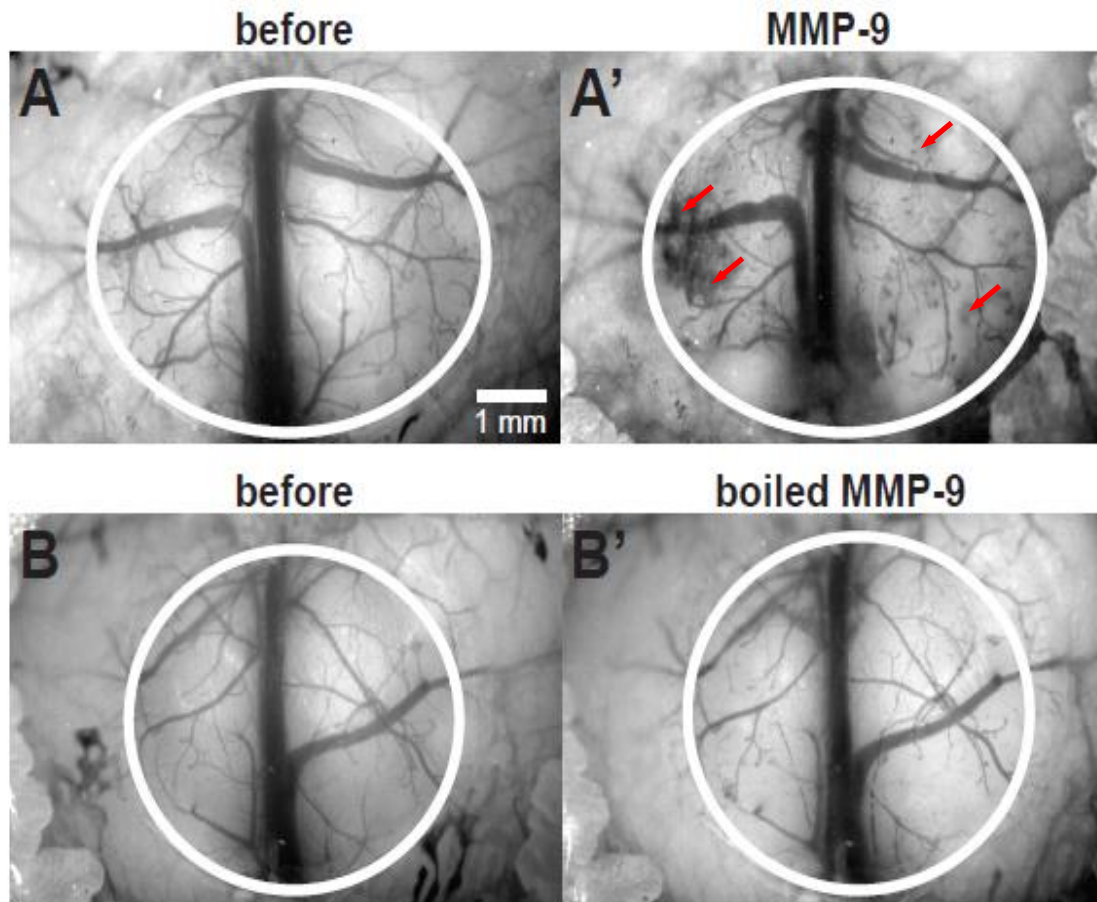

Supplement: NIHMS709363-supplement.pdf [file NIHMS709363-supplement.pdf]
